# Supplementary material for: Mucosal Vaccination with a Newcastle Disease Virus-Vectored Vaccine Reduces Viral Loads in SARS-CoV-2-Infected Cynomolgus Macaques
Source: MDPI journal article supplement (doi:10.3390/vaccines12040404), 2024-04-10
Supplement: s1 [file s1]

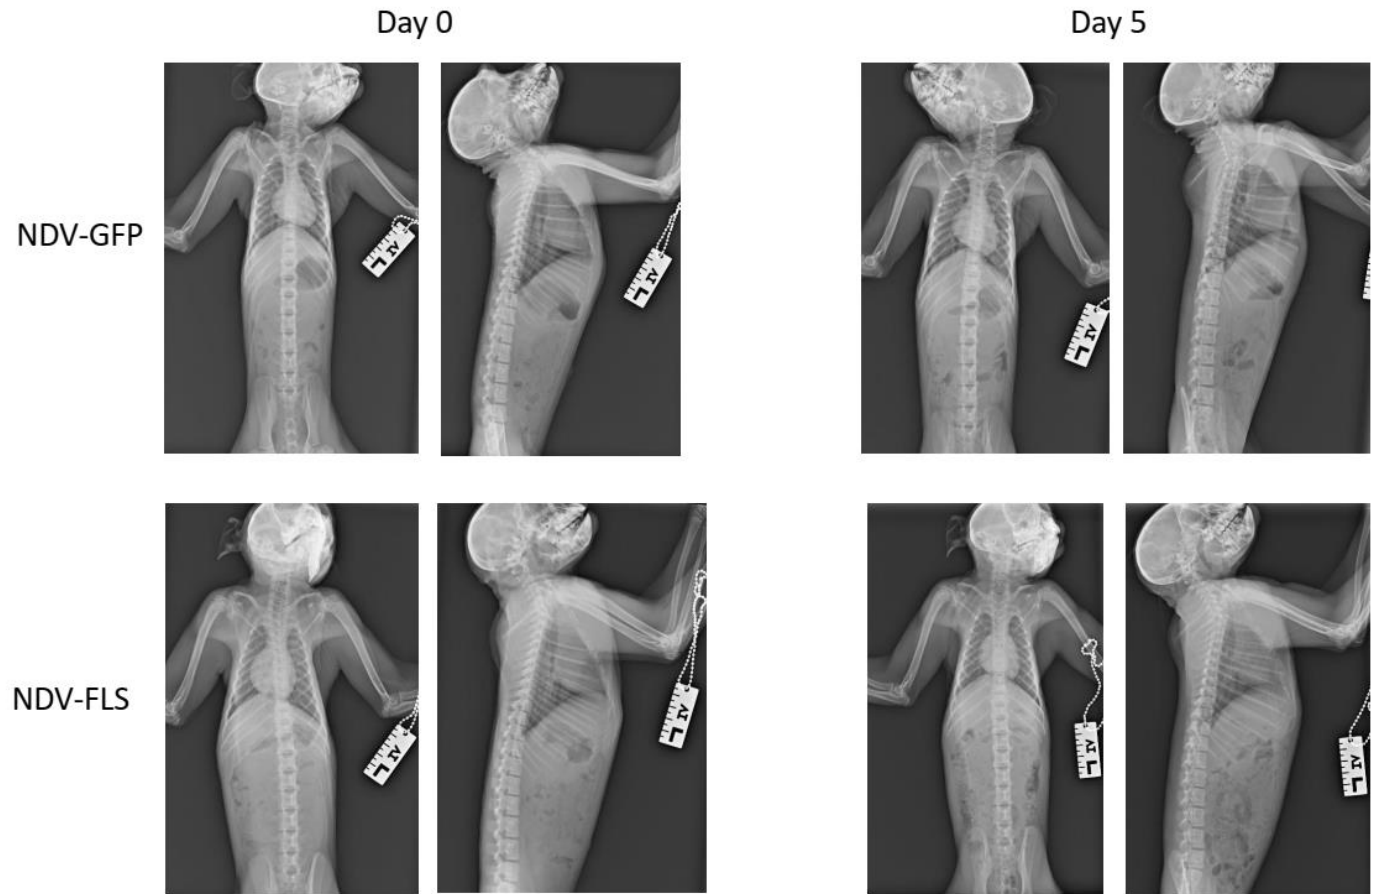

**Figure S2. X-Rays of SARS-CoV-2 infected animals.** Representative images of x-rays taken on day 0 and day 5 pi of control and vaccinated macaques.

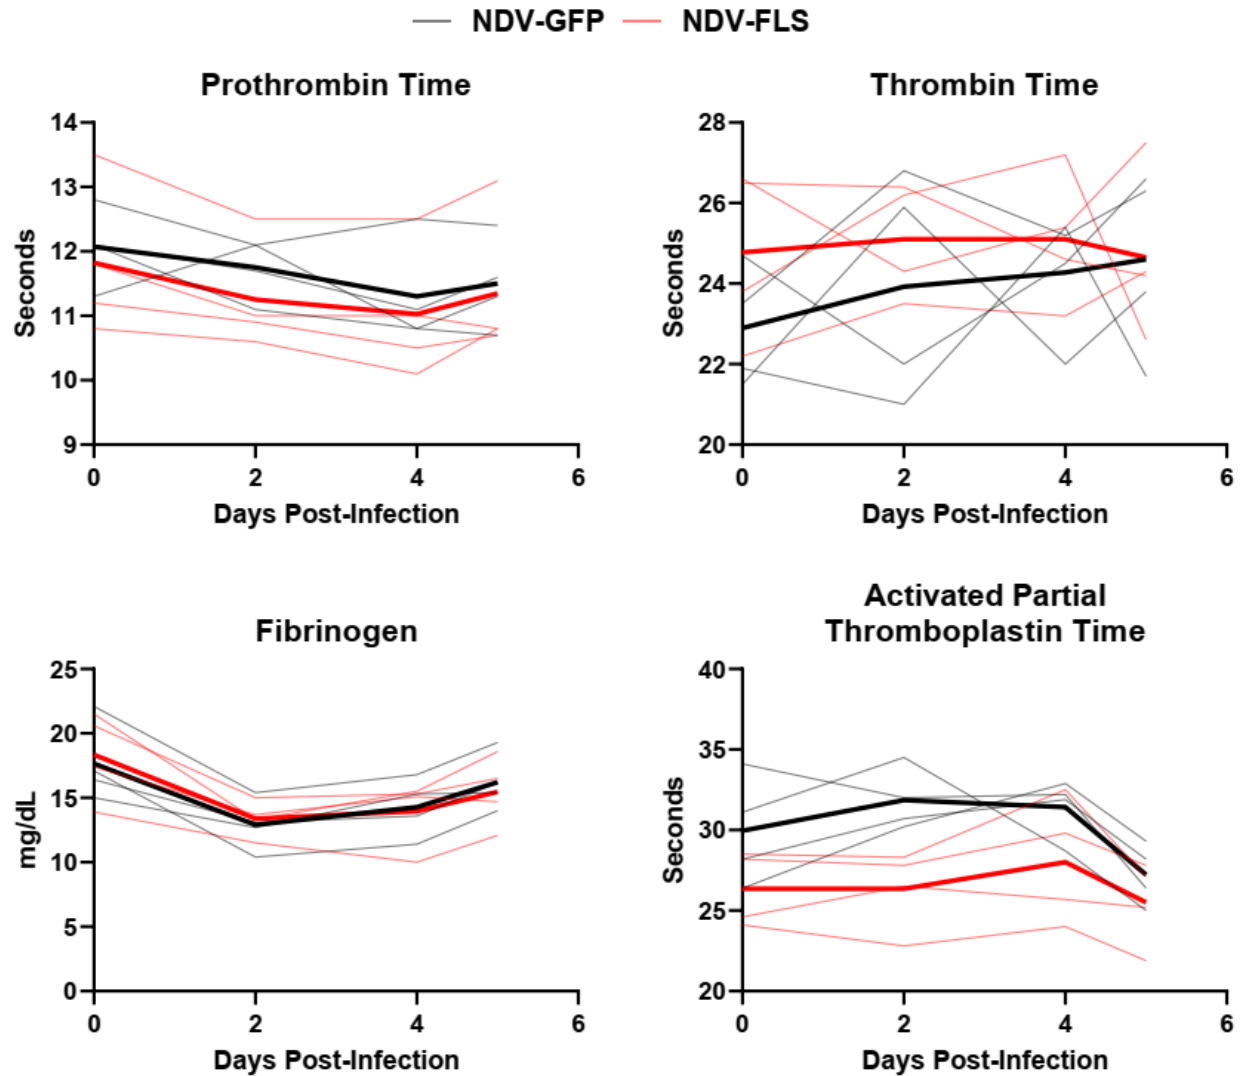

**Figure S3. Coagulation parameters in SARS-CoV-2 infected animals.** Prothrombin time, thrombin time, fibrinogen levels, and activated partial thromboplastin time throughout infection for all animals. Solid thick black and red lines represent the mean for each group, while semi-transparent lines represent each individual animal. n=4.

Controls

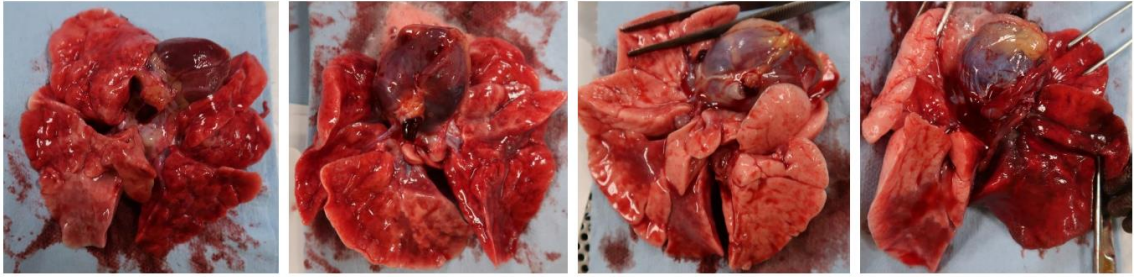

Vaccinated\*

\*Missing 9294

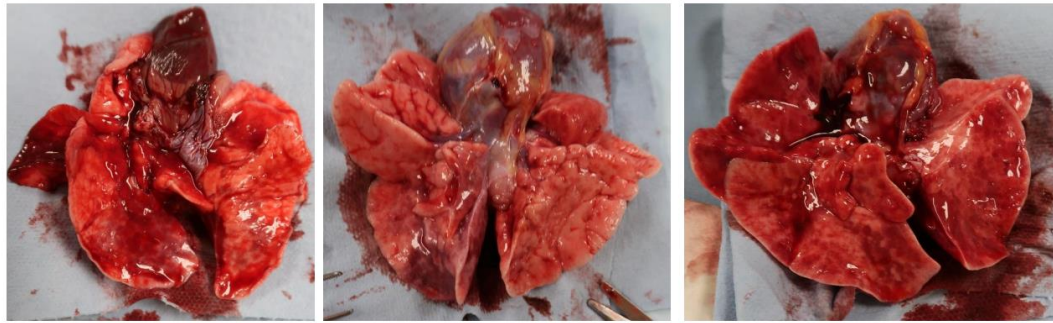

**Figure S4. Lung Gross pathology of SARS-CoV-2 infected animals.** Images of the lungs of infected animals upon necropsy on day 5 pi. Missing is the image for one vaccinated animal that was not taken (female; animal 9294).

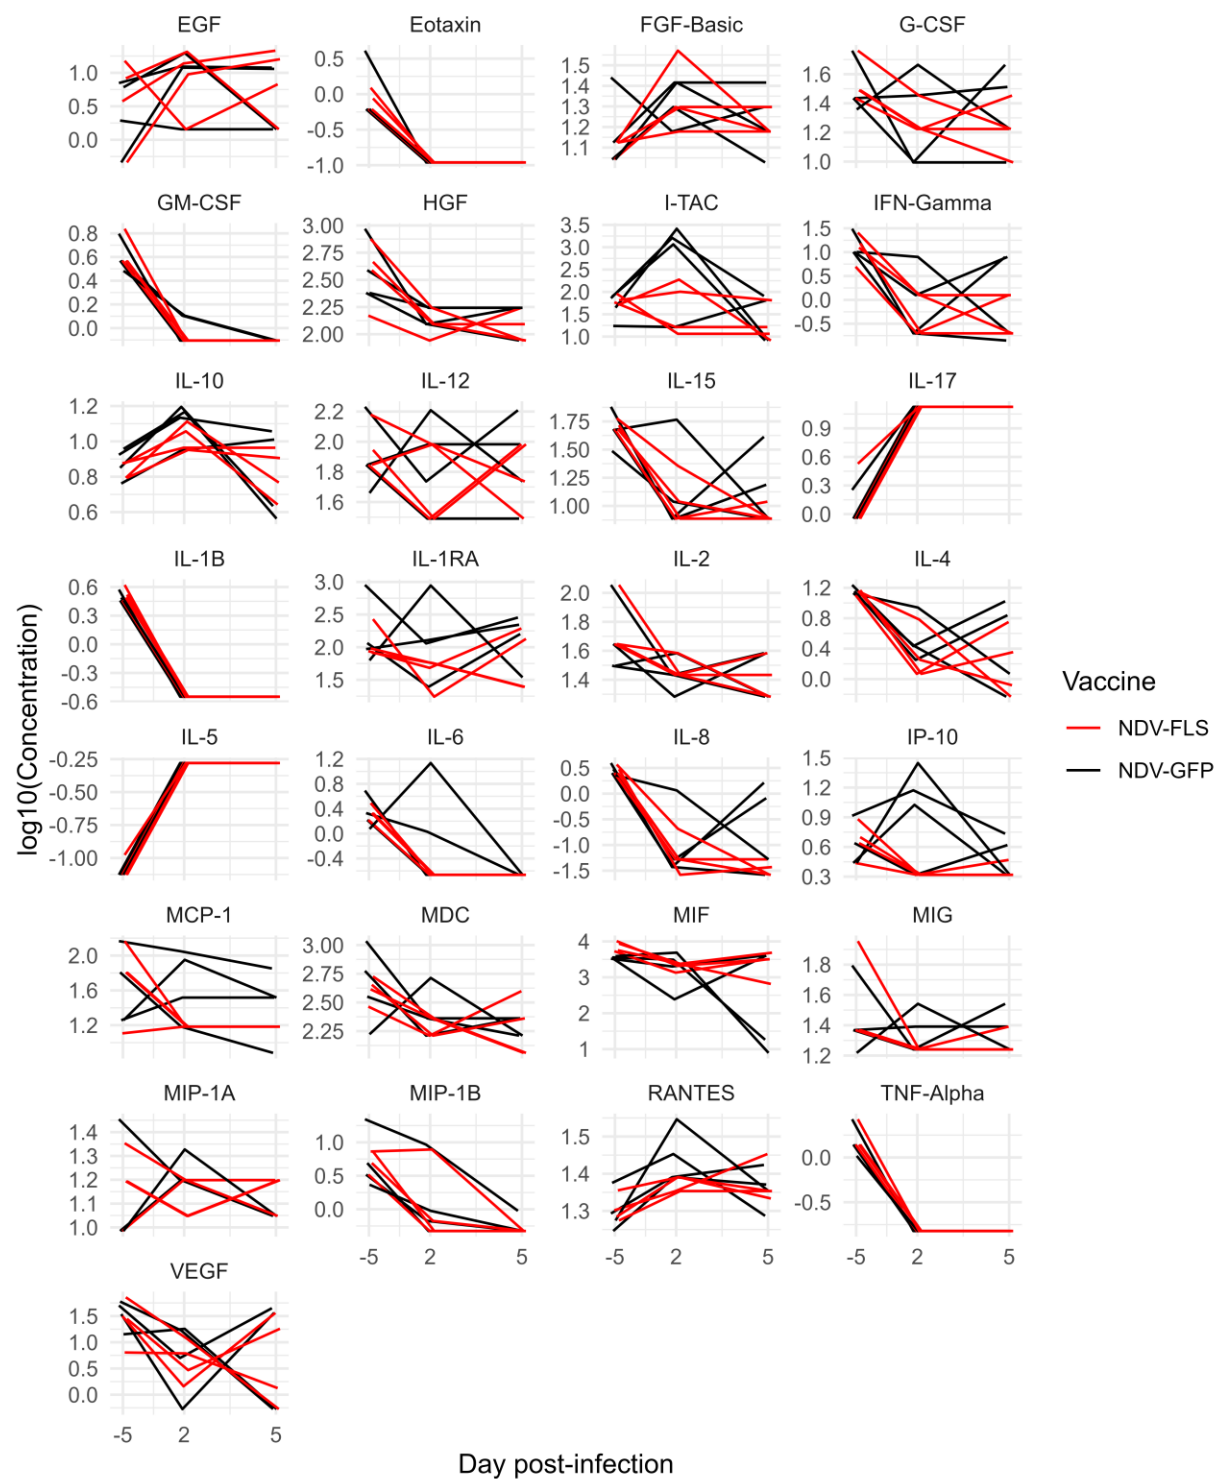

**Figure S5. Cytokine and chemokine levels in BAL fluid.** Expression levels of the indicated cytokine or chemokine in the BAL fluid of NHP on day 44 after vaccination (5 days prior to challenge) and on days 2 and 5 post-challenge with SARS-CoV-2 were detected by Luminex assay. Data for individual animals are shown at each time point.

**Table S1. Animal ID and Group Information.**

| <b>Animal ID and Sex</b> | <b>Vaccine</b> |
|--------------------------|----------------|
| 6768 M                   | NDV-GFP        |
| 3760 M                   | NDV-GFP        |
| 0673 F                   | NDV-GFP        |
| 8158 F                   | NDV-GFP        |
| 7550 M                   | NDV-FLS        |
| 9670 M                   | NDV-FLS        |
| 8761 F                   | NDV-FLS        |
| 9294 F                   | NDV-FLS        |
